# Supplementary material for: LipoFNT: Lipoylation Sites Identification with Flexible Neural Tree
Source: Hindawi journal article supplement (doi:10.1155/2019/1603867), 2019-01-01
Supplement: f1 [file 1603867.f1.zip]

Archive with 22 entries (19 files):
- supplementary/
- supplementary/DATA/
- supplementary/DATA/negative samples.txt
- supplementary/DATA/positive samples.txt
- supplementary/Figures/
- supplementary/Figures/length11.emf
- supplementary/Figures/length13.emf
- supplementary/Figures/length15.emf
- supplementary/Figures/length17.emf
- supplementary/Figures/length19.emf
- supplementary/Figures/length21.emf
- supplementary/Figures/length23.emf
- supplementary/Figures/length25.emf
- supplementary/Figures/length27.emf
- supplementary/Figures/length29.emf
- supplementary/Figures/length3.emf
- supplementary/Figures/length5.emf
- supplementary/Figures/length7.emf
- supplementary/Figures/length9.emf
- supplementary/S1.docx
- supplementary/Supplementary material.docx
- supplementary/Supplementary material.pdf
