# Supplementary material for: LipoFNT: Lipoylation Sites Identification with Flexible Neural Tree
Source: Hindawi journal article supplement (doi:10.1155/2019/1603867), 2019-01-01
Supplement: f1 [file 1603867.f1.zip › supplementary/DATA/negative samples.txt]

FPGRRSVGLVKGALGWSVSRG
STQWLRGDPIKILMPSLSPTM
SPTMEEGNIVKWLKKEGEAVS
MEEGNIVKWLKKEGEAVSAGD
EEGNIVKWLKKEGEAVSAGDA
LDASDDGILAKIVVEEGSKNI
LAKIVVEEGSKNIRLGSLIGL
GLIVEEGEDWKHVEIPKDVGP
GEDWKHVEIPKDVGPPPPVSK
KDVGPPPPVSKPSEPRPSPEP
SPEPQISIPVKKEHIPGTLRF
PEPQISIPVKKEHIPGTLRFR
LSPAARNILEKHSLDASQGTA
TATGPRGIFTKEDALKLVQLK
RGIFTKEDALKLVQLKQTGKI
KEDALKLVQLKQTGKITESRP
LKLVQLKQTGKITESRPTPAP
PASNIRRVIAKRLTESKSTVP
RVIAKRLTESKSTVPHAYATA
TADCDLGAVLKVRQDLVKDDI
AVLKVRQDLVKDDIKVSVNDF
VRQDLVKDDIKVSVNDFIIKA
IKVSVNDFIIKAAAVTLKQMP
FIIKAAAVTLKQMPDVNVSWD
VNVSWDGEGPKQLPFIDISVA
IDISVAVATDKGLLTPIIKDA
TDKGLLTPIIKDAAAKGIQEI
LTPIIKDAAAKGIQEIADSVK
KGIQEIADSVKALSKKARDGK
EIADSVKALSKKARDGKLLPE
IADSVKALSKKARDGKLLPEE
KALSKKARDGKLLPEEYQGGS
LAVGRFRPVLKLTEDEEGNAK
KLTEDEEGNAKLQQRQLITVT
VDDELATRFLKSFKANLENPI
ELATRFLKSFKANLENPIRLA
PFFVHPPTLMKWGGGSRSWFS
GEGIAECELLKWFVKEGDSVE
AECELLKWFVKEGDSVEEFQP
KATIEITSRFKGKVALISHSP
TIEITSRFKGKVALISHSPGD
LISHSPGDIIKVGETLVRLAV
SSEIVTLGGSKQGTENLLGAL
LSTPAVRNLAKDLGIDINVIT
IDINVITGTGKDGRVLKEDVL
TGTGKDGRVLKEDVLRFSDQK
KEDVLRFSDQKGFVTDSVSSE
AVIGGDSVSTKASSNFEDKTV
STKASSNFEDKTVPLRGFSRA
PLRGFSRAMVKTMTMATSVPH
EINCDSLVELKQFFKENNTDS
DSLVELKQFFKENNTDSTIKH
FKENNTDSTIKHTFLPTLIKS
IKHTFLPTLIKSLSMALTKYP
LIKSLSMALTKYPFVNSCFNA
FNAESLEIILKGSHNIGVAMA
TEHGLVVPNIKNVQSLSLLEI
VQSLSLLEITKELSRLQHLAA
SRLQHLAANNKLNPEDVTGGT
TLSNIGAIGGKFGSPLLNLPE
VAIIALGRIEKVPKFSKEGTV
IALGRIEKVPKFSKEGTVYPA
GRIEKVPKFSKEGTVYPASIM
ATVARFCCQWKEYVEKPELLM
FCCQWKEYVEKPELLMLQMRX
MLRTWSRNAGKLICVRYFQTC
FQTCGNVHVLKPNYVCFFGYP
YVCFFGYPSFKYSHPHHFLKT
FKYSHPHHFLKTTAALRGQVV
AALRGQVVQFKLSDIGEGIRE
IGEGIREVTVKEWYVKEGDTV
REVTVKEWYVKEGDTVSQFDS
TITSRYDGVIKKLYYNLDDIA
ITSRYDGVIKKLYYNLDDIAY
YNLDDIAYVGKPLVDIETEAL
PLVDIETEALKDSEEDVVETP
SHDEHTHQEIKGRKTLATPAV
EHTHQEIKGRKTLATPAVRRL
VRRLAMENNIKLSEVVGSGKD
IKLSEVVGSGKDGRILKEDIL
VGSGKDGRILKEDILNYLEKQ
LKEDILNYLEKQTGAILPPSP
QTGAILPPSPKVEIMPPPPKP
PKVEIMPPPPKPKDMTVPILV
VEIMPPPPKPKDMTVPILVSK
KDMTVPILVSKPPVFTGKDKT
LVSKPPVFTGKDKTEPIKGFQ
SKPPVFTGKDKTEPIKGFQKA
FTGKDKTEPIKGFQKAMVKTM
DKTEPIKGFQKAMVKTMSAAL
PIKGFQKAMVKTMSAALKIPH
AMVKTMSAALKIPHFGYCDEI
CDEIDLTELVKLREELKPIAF
TELVKLREELKPIAFARGIKL
LKPIAFARGIKLSFMPFFLKA
IKLSFMPFFLKAASLGLLQFP
VDENCQNITYKASHNIGIAMD
TEQGLIVPNVKNVQICSIFDI
DIATELNRLQKLGSVGQLSTT
NIGSIGGTFAKPVIMPPEVAI
EVAIGALGSIKAIPRFNQKGE
SIKAIPRFNQKGEVYKAQIMN
PRFNQKGEVYKAQIMNVSWSA
ATMSRFSNLWKSYLENPAFML
ENPAFMLLDLKXXXXXXXXXX
RRYYSLPPHQKVPLPSLSPTM
MQAGTIARWEKKEGDKINEGD
QAGTIARWEKKEGDKINEGDL
IARWEKKEGDKINEGDLIAEV
FESLEECYMAKILVAEGTRDV
IGAIICITVGKPEDIEAFKNY
VGKPEDIEAFKNYTLDSSAAP
MTMGTVQRWEKKVGEKLSEGD
TMGTVQRWEKKVGEKLSEGDL
VQRWEKKVGEKLSEGDLLAEI
FEVQEEGYLAKILVPEGTRDV
LGTPLCIIVEKEADISAFADY
DYRPTEVTDLKPQVPPPTPPP
APCPATPAGPKGRVFVSPLAK
KGRVFVSPLAKKLAVEKGIDL
GRVFVSPLAKKLAVEKGIDLT
SPLAKKLAVEKGIDLTQVKGT
VEKGIDLTQVKGTGPDGRITK
KGTGPDGRITKKDIDSFVPSK
GTGPDGRITKKDIDSFVPSKV
KKDIDSFVPSKVAPAPAAVVP
RVIAQRLMQSKQTIPHYYLSI
VNMGEVLLVRKELNKILEGRS
EVLLVRKELNKILEGRSKISV
ELNKILEGRSKISVNDFIIKA
SKISVNDFIIKASALACLKVP
IIKASALACLKVPEANSSWMD
ITPIVFNAHIKGVETIANDVV
IANDVVSLATKAREGKLQPHE
VSLATKAREGKLQPHEFQGGT
TISNLGMFGIKNFSAIINPPQ
CILAIGASEDKLVPADNEKGF
EDKLVPADNEKGFDVASMMSV
VGAQWLAEFRKYLEKPITMLL
WLAEFRKYLEKPITMLLXXXX
RTGPALLSVRKFTEKHEWVTT
ALLSVRKFTEKHEWVTTENGI
VYCSLPEVGTKLNKQDEFGAL
SLPEVGTKLNKQDEFGALESV
ALAENPGLVNKSCYEDGWLIK
KSCYEDGWLIKMTLSNPSELD
DELMSEEAYEKYIKSIEEXXX
MSEEAYEKYIKSIEEXXXXXX
FLSTASLTNSKSNISFASSVS
SHRRSMTVRSKIREIFMPALS
PALSSTMTEGKIVSWIKTEGE
MTEGKIVSWIKTEGEKLAKGE
IVSWIKTEGEKLAKGESVVVV
WIKTEGEKLAKGESVVVVESD
AETEAEIEEAKSKAASKSSSS
TEAEIEEAKSKAASKSSSSVA
IEEAKSKAASKSSSSVAEAVV
PVTAVSDGPRKTVATPYAKKL
PRKTVATPYAKKLAKQHKVDI
RKTVATPYAKKLAKQHKVDIE
VATPYAKKLAKQHKVDIESVA
PYAKKLAKQHKVDIESVAGTG
VETAAGIAPSKSSIAPPPPPP
PPPPPPPVTAKATTTNLPPLL
PFTAMQSAVSKNMIESLSVPT
NTDALDALYEKVKPKGVTMTA
DALDALYEKVKPKGVTMTALL
LDALYEKVKPKGVTMTALLAK
KGVTMTALLAKAAGMALAQHP
AQHPVVNASCKDGKSFSYNSS
PVVNASCKDGKSFSYNSSINI
LITPVLQDADKLDLYLLSQKW
DKLDLYLLSQKWKELVGKARS
LDLYLLSQKWKELVGKARSKQ
LSQKWKELVGKARSKQLQPHE
WKELVGKARSKQLQPHEYNSG
QGAIMAVGASKPTVVADKDGF
GASKPTVVADKDGFFSVKNTM
VADKDGFFSVKNTMLVNVTAD
DLAAFLQTFAKIIENPDSLTL
SNGSSPSLFAKSLQSSRVAAS
ITDGTLATFLKKPGERVQADE
TDGTLATFLKKPGERVQADEA
NEGDTVEPGTKVAIISKSEDT
EPGTKVAIISKSEDTASQVTP
DTASQVTPSQKIPETTDTKPS
SQKIPETTDTKPSPPAEDKQK
DTKPSPPAEDKQKPRVESAPV
KPSPPAEDKQKPRVESAPVAE
PRVESAPVAEKPKAPSSPPPP
VESAPVAEKPKAPSSPPPPKQ
PKAPSSPPPPKQSAKEPQLPP
SSPPPPKQSAKEPQLPPKERE
QSAKEPQLPPKERERRVPMTR
ERRVPMTRLRKRVATRLKDSQ
RLRKRVATRLKDSQNTFALLT
FNEVDMTNLMKLRSQYKDAFY
TNLMKLRSQYKDAFYEKHGVK
RSQYKDAFYEKHGVKLGLMSG
KDAFYEKHGVKLGLMSGFIKA
VKLGLMSGFIKAAVSALQHQP
VDISIAVGTSKGLVVPVIRGA
LVVPVIRGADKMNFAEIEKTI
ADKMNFAEIEKTINSLAKKAN
EIEKTINSLAKKANEGTISID
IEKTINSLAKKANEGTISIDE
REAVYFLRRVKDVVEDPQRLL
LWTTRMPTVSKLFLRNSSGNA
LRNSSGNALNKNKLPFLYSSQ
NSSGNALNKNKLPFLYSSQGP
QHEWIAVHQDKTAFVGITKYA
QDKTAFVGITKYATDALGDAT
EDPMGDGWLVKMKLGEGVNVE
PMGDGWLVKMKLGEGVNVEQV
EGLMSLEQYEKTLVHDDXXXX
VTEGTITQWLKSVGDTVEVDE
SPVAGVILEIKAEEDDTVDVG
PAPAEEEEPVKEEPKKEAAPE
EEEEPVKEEPKKEAAPEAPAA
EEEPVKEEPKKEAAPEAPAAT
VTEGTITQWLKAVGDTVEVDE
AAPAEEEEPVKEEPKKEAAPE
EEEEPVKEEPKKEAAPEAPAA
EEEPVKEEPKKEAAPEAPAAT
VTEGTITQWLKAVGDTVEVDE
AAPAEEEEPVKEEPKKEEPKK
EEEEPVKEEPKKEEPKKEEPK
EEEPVKEEPKKEEPKKEEPKK
VKEEPKKEEPKKEEPKKEAAT
KEEPKKEEPKKEEPKKEAATT
KKEEPKKEEPKKEAATTPAAA
KEEPKKEEPKKEAATTPAAAS
NVPYVTPLVRKLAEKHGVDLN
VTPLVRKLAEKHGVDLNTVTG
TGTGIGGRIRKQDVLAAANGE
AAAPVSAWSTKSVDPEKAKLR
AWSTKSVDPEKAKLRGTTQKV
STKSVDPEKAKLRGTTQKVNR
EKAKLRGTTQKVNRIREITAM
VNRIREITAMKTVEALQISAQ
VDMTRVAELRKKNKPAFIEKH
DMTRVAELRKKNKPAFIEKHG
TRVAELRKKNKPAFIEKHGVN
RKKNKPAFIEKHGVNLTYLPF
VNLTYLPFFVKAVVEALVSHP
HPNVNASFNAKTKEMTYHSSV
NVNASFNAKTKEMTYHSSVNL
AQDLSIPEIAKAIVDLADRSR
VDLADRSRNNKLKPNDLSGGT
LADRSRNNKLKPNDLSGGTFT
AGILGTGAIVKRPVVITEDGI
ADAGRFLTTIKDRLETANFEG
ELGGAEGDVLKVGAELVRIDT
SRPLAAPVVRKLAKELAVDLA
LAAPVVRKLAKELAVDLAALQ
VHGVHARMAEKMTLSHKEIPT
RMAEKMTLSHKEIPTAKASVE
TLSHKEIPTAKASVEVICAEL
LTLRLLVIALKHNVILNSTWV
LVPVVTDAQDKNTRELASRVA
EAAILGLGAIKPRPVVVGGEV
XXXXXXXXXMKKINILVPDLP
XXXXXXXXMKKINILVPDLPE
PESISDATVVKWHKKIGDTVH
ISDATVVKWHKKIGDTVHCDD
SDATVVKWHKKIGDTVHCDDN
CDGILQSILEKEGKVVISQQT
ILQSILEKEGKVVISQQTLGE
ISQQTLGEINKSTVVDNHLSN
NHLSNNHIIEKEDNLLKKEEK
HIIEKEDNLLKKEEKYITTEE
IIEKEDNLLKKEEKYITTEEK
KEDNLLKKEEKYITTEEKKEI
KEEKYITTEEKKEIEYLLKDN
EEKYITTEEKKEIEYLLKDNH
EEKKEIEYLLKDNHKHLTPSM
EIEYLLKDNHKHLTPSMRRSV
HLTPSMRRSVKIHNINNGFLN
GFLNQVIETSKKTNFENIIKE
FLNQVIETSKKTNFENIIKEE
SKKTNFENIIKEEKKESNQIL
TNFENIIKEEKKESNQILFNH
NFENIIKEEKKESNQILFNHN
HNIFNANENNKNNNNKVTNRV
ANENNKNNNNKVTNRVKMTRL
NNNNKVTNRVKMTRLRQRIAE
QRIAERLLDSKNNTAMLTTFH
MLTTFHEVNMKPIILLRKKYG
VNMKPIILLRKKYGEDFEKKH
NMKPIILLRKKYGEDFEKKHN
LRKKYGEDFEKKHNVRIGFMS
RKKYGEDFEKKHNVRIGFMSF
VRIGFMSFFVKAVIQALKNFP
FFVKAVIQALKNFPEINAYID
YIDQTDIVFYKNFDISIAIST
ADTMTMAEIEKKIKDFSIKGL
DTMTMAEIEKKIKDFSIKGLQ
MTMAEIEKKIKDFSIKGLQNK
IEKKIKDFSIKGLQNKINIKE
KDFSIKGLQNKINIKELMGGN
IKGLQNKINIKELMGGNFTIT
ERPVVVNGQIKILPMMYLALS
LSYDHRLIDGKESVGFLINIK
KESVGFLINIKNILEDFNRIA
SYGNGFRMMAKCLLSLRSGYS
SGYSVTAPVSKSMANVLWARY
LWARYASTRIKTPPFPESITE
ITEGTLAQWLKQPGEYVNKDE
WLKQPGEYVNKDEEIASVETD
PVTAPDAGVLKEQLVKEGDTI
DAGVLKEQLVKEGDTITIDQD
APPEGGSAGPKKDEVKTADAD
PPEGGSAGPKKDEVKTADADA
GSAGPKKDEVKTADADAAKDL
EVKTADADAAKDLSTPQDSSK
KDLSTPQDSSKPIEEKPMPDL
PQDSSKPIEEKPMPDLGAEQK
KPMPDLGAEQKESAPSSTKPA
EQKESAPSSTKPAPDAKEPEF
PSSTKPAPDAKEPEFSSPKPK
DAKEPEFSSPKPKPAKSEPVK
KEPEFSSPKPKPAKSEPVKQS
EFSSPKPKPAKSEPVKQSKPK
KPKPAKSEPVKQSKPKATETA
PAKSEPVKQSKPKATETARPS
KSEPVKQSKPKATETARPSSF
SSFSRNEDRVKMNRMRLRIAE
RMRLRIAERLKESQNRAASLT
CDMSAVVALRKKYKDEILKET
DMSAVVALRKKYKDEILKETG
SAVVALRKKYKDEILKETGVK
LRKKYKDEILKETGVKIGFMS
KDEILKETGVKIGFMSFFSKA
VKIGFMSFFSKACTQAMKQIP
FFSKACTQAMKQIPAINGSIE
AINGSIEGEGKGDTLVYRDFC
CDLSIAVATPKGLVTPVIRNA
IESAIATLGSKARAGKLAIED
ATLGSKARAGKLAIEDMASGT
QTAVLGLHAIKERPVVINGQV
REAVTFLRLVKEYIEDPAKML
LVKEYIEDPAKMLLVXXXXXX
XXXXXXMPEVKVPELAESITE
ITEGTIAEWLKNLGDSVEKGE
WLKNLGDSVEKGEAILELETD
VIGEGSGNASKENSNDNTPQQ
PQQNDETTNNKKEETTNKSAD
QQNDETTNNKKEETTNKSADK
TNNKKEETTNKSADKAEVNQT
KEETTNKSADKAEVNQTNDDN
NGVNLAEVSPKTNDVVRKEDI
VSPKTNDVVRKEDIDKKQQAP
NDVVRKEDIDKKQQAPASTQT
DVVRKEDIDKKQQAPASTQTT
STQTTQQAPAKEEKKYNQYPT
TTQQAPAKEEKKYNQYPTKPV
TQQAPAKEEKKYNQYPTKPVI
EEKKYNQYPTKPVIREKMSRR
QYPTKPVIREKMSRRKKTAAK
PVIREKMSRRKKTAAKKLLEV
VIREKMSRRKKTAAKKLLEVS
KMSRRKKTAAKKLLEVSNNTA
MSRRKKTAAKKLLEVSNNTAM
VDMTNVMELRKRKKEQFMKDH
MTNVMELRKRKKEQFMKDHDG
TNVMELRKRKKEQFMKDHDGT
LRKRKKEQFMKDHDGTKLGFM
EQFMKDHDGTKLGFMSFFTKA
TKLGFMSFFTKASVAALKKYP
FFTKASVAALKKYPEVNAEID
FTKASVAALKKYPEVNAEIDG
AEIDGDDMITKQYYDIGVAVS
LLVPFVRDCDKKNFAEIEAEI
LVPFVRDCDKKNFAEIEAEIA
IEAEIANLAVKAREKKLGLDD
IANLAVKAREKKLGLDDMVNG
ANLAVKAREKKLGLDDMVNGS
LSYDHRIIDGKEAVGFLKTIK
IDGKEAVGFLKTIKELIENPE
KEAVGFLKTIKELIENPEDLL
XXXXXXXXMFKVKFADIGEGL
XXXXXXMFKVKFADIGEGLTE
TEGTVAEVLVKVGDVVKEGQS
EVLVKVGDVVKEGQSLYFVET
NSEIPAPVAGKIAVINIKAGQ
VAGKIAVINIKAGQEIKVGDV
VINIKAGQEIKVGDVVMEIED
GSDTSATSEPKAETKSEAKVE
SATSEPKAETKSEAKVEVVEE
EPKAETKSEAKVEVVEENASV
TPVSNDVIVRKQTTTVNKSST
IVRKQTTTVNKSSTIKATPLA
TTTVNKSSTIKATPLARKVAA
STIKATPLARKVAADLNIDLS
PNQRILVADIKNHQASSTQLA
SAHQTIAPTIKVVEPSAPLSW
WDEVPMNGVRKATVKAMTKSH
PMNGVRKATVKAMTKSHTEIA
VRKATVKAMTKSHTEIAAFTG
HTEIAAFTGMKNTDITETHKM
MKNTDITETHKMRTELKDHAA
TETHKMRTELKDHAAASGIKL
LKDHAAASGIKLTYLAFIIKA
IKLTYLAFIIKAVAKSLRDMP
YLAFIIKAVAKSLRDMPNINV
INVRGDFANNKIQFMHNINIG
TPNGLMVPVIKGADHLSVFEI
DHLSVFEIAIKISELANKAKD
IAIKISELANKAKDGKLTRAE
IKISELANKAKDGKLTRAEMT
SELANKAKDGKLTRAEMTEAT
TPLYINGELQKRFIMPLSMTC
DGADAGRFLIKVQDYLSKPVL
FLIKVQDYLSKPVLLFMXXXX
GDGEVIELLVKTGDLIEVEQG
AKASMEVPSPKAGVVKSVSVK
EVPSPKAGVVKSVSVKLGDKL
KAGVVKSVSVKLGDKLKEGDA
VKSVSVKLGDKLKEGDAIIEL
SVSVKLGDKLKEGDAIIELEP
VRVPDIGSAGKARVIEVLVKA
GKARVIEVLVKAGDQVQAEQS
APAAAGPQEVKVPDIGSAGKA
VKVPDIGSAGKARVIEVLVKA
GKARVIEVLVKAGDQVQAEQS
PVGAPSRNGAKVHAGPAVRQL
NSTGPRGRILKEDVQAYVKAM
ILKEDVQAYVKAMMQKAKEAP
VQAYVKAMMQKAKEAPAAGAA
AYVKAMMQKAKEAPAAGAASG
IPPIPPVDFAKYGEIEEVPMT
TELEAFRVAQKAVAEKAGVKL
FRVAQKAVAEKAGVKLTVLPL
QKAVAEKAGVKLTVLPLLLKA
VKLTVLPLLLKACAYLLKELP
LLLKACAYLLKELPDFNSSLA
LAPSGQALIRKKYVHIGFAVD
APSGQALIRKKYVHIGFAVDT
LVPVIRNVDQKSLLQLAAEAA
LAAEAAELAEKARSKKLGADA
AAELAEKARSKKLGADAMQGA
AELAEKARSKKLGADAMQGAC
APEVAILGVSKASMQPVWDGK
KASMQPVWDGKAFQPRLMLPL
INGAAAARFTKRLGDLLADIR
XXXXXMANEFKFTDVGEGLHE
TDVGEGLHEGKVTEILKKVGD
LHEGKVTEILKKVGDTIKVDE
HEGKVTEILKKVGDTIKVDEA
EILKKVGDTIKVDEALFVVET
EAGASVVGEIKVSNSVFPIFG
EETIAITTMRKAIAEAMVKSH
MRKAIAEAMVKSHENIPATIL
TILTFYVNATKLKQYRESVNG
LTFYVNATKLKQYRESVNGLA
RESVNGLALSKYNMKISFFAF
NGLALSKYNMKISFFAFFVKA
MKISFFAFFVKAIVNALKKFP
FFVKAIVNALKKFPVFNGRYD
FVKAIVNALKKFPVFNGRYDK
KFPVFNGRYDKERNLIVLNKD
DKERNLIVLNKDVNVGIAVDT
TPDGLIVPNIKQAQTKSVVDI
IVPNIKQAQTKSVVDIAKDIV
AQTKSVVDIAKDIVDLANRAR
IVDLANRARSKQIKLPDLSKG
LANRARSKQIKLPDLSKGTIS
SKQIKLPDLSKGTISVTNFGS
LGAAFGTPIIKHPEMCIVATG
VDGADVGRFGKEIAKQIEELI
DVGRFGKEIAKQIEELIDLEV
XXXXXXXMPIKILMPALSPTM
ILMPALSPTMKDGNLARWLKK
MKDGNLARWLKKEGDKVNPGE
KDGNLARWLKKEGDKVNPGEV
LARWLKKEGDKVNPGEVIAEI
VESVDEGILAKIIIPQNSQNV
STADIDAFIAKNNSVSLSLKT
AKNNSVSLSLKTDTTLKKANE
SLSLKTDTTLKKANESITNVE
LSLKTDTTLKKANESITNVEV
NESITNVEVVKHDLSKIFASP
NVEVVKHDLSKIFASPLAKRL
LSKIFASPLAKRLAKIRNIRL
FASPLAKRLAKIRNIRLESVQ
QGSGPHGRIVKQDILSYSPST
PNNNIRQIIAKRLLESKQTVP
QIIAKRLLESKQTVPHFYLSI
FYLSIECNVDKLLDIREDINK
KLLDIREDINKSFSEDKLTKI
EDINKSFSEDKLTKISVNDFI
NKSFSEDKLTKISVNDFIILA
VNDFIILAVAKALQEVPNANA
IENGIVTPIIKDANKKNIIEL
IVTPIIKDANKKNIIELSHEM
VTPIIKDANKKNIIELSHEMK
KNIIELSHEMKILIKKAKDNK
ELSHEMKILIKKAKDNKLTPV
LSHEMKILIKKAKDNKLTPVE
HEMKILIKKAKDNKLTPVEFQ
KILIKKAKDNKLTPVEFQGGG
TISNLGMYGIKNFNAIINTPQ
SCIMGVGASTKRAIVKNDQII
VGASTKRAIVKNDQIIIATIM
AVSAEFLASFKRFIEHPVLML
GEGIHEGEIVKWFIKAGDTIE
HEGEIVKWFIKAGDTIEEDDV
TVAVVGDVIVKIDAPDAEEMQ
DAPDAEEMQFKGHGDDEDSKK
FKGHGDDEDSKKEEKEQESPV
KGHGDDEDSKKEEKEQESPVQ
GDDEDSKKEEKEQESPVQEEA
EEASSTQSQEKTEVDESKTVK
SQEKTEVDESKTVKAMPSVRK
KTEVDESKTVKAMPSVRKYAR
KTVKAMPSVRKYARENGVNIK
KYARENGVNIKAVNGSGKNGR
VNIKAVNGSGKNGRITKEDID
NGSGKNGRITKEDIDAYLNGG
PEGDFPETTEKIPAMRKAIAK
ETTEKIPAMRKAIAKAMVNSK
KIPAMRKAIAKAMVNSKHTAP
KAIAKAMVNSKHTAPHVTLMD
IDVQELWDHRKKFKEIAAEQG
DVQELWDHRKKFKEIAAEQGT
QELWDHRKKFKEIAAEQGTKL
FKEIAAEQGTKLTFLPYVVKA
TKLTFLPYVVKALVSALKKYP
YVVKALVSALKKYPALNTSFN
VVKALVSALKKYPALNTSFNE
FNEEAGEVVHKHYWNIGIAAD
WNIGIAADTDKGLLVPVVKHA
TDKGLLVPVVKHADRKSIFEI
LVPVVKHADRKSIFEISDEIN
ISDEINELAVKARDGKLTSEE
NELAVKARDGKLTSEEMKGAT
RDGKLTSEEMKGATCTISNIG
AILGIGRIAQKPIVKDGEIVA
IGRIAQKPIVKDGEIVAAPVL
ATGQNAMNHIKRLLNNPELLL
XXXXXXMYEFKFADIGEGIHE
HEGTVLQWNFKVGDKVKEGET
VLQWNFKVGDKVKEGETLVIV
QWNFKVGDKVKEGETLVIVET
VDGTIVSLGAKEGEEIHVGQI
PAASGDIYDFKFADIGEGIHE
HEGTILQWNFKVGDKVKEGET
ILQWNFKVGDKVKEGETLVVV
QWNFKVGDKVKEGETLVVVET
LPSPVDGTILKLGKAEGEVIH
PVDGTILKLGKAEGEVIHVGE
GATLEQAQAPKAEAPVSEPKK
PKAEAPVSEPKKGAGVVGEIE
KAEAPVSEPKKGAGVVGEIEV
EEVHVVATTGKVLASPVARKL
GKVLASPVARKLASDLGVDIA
SDLGVDIATIKGSGEQGRVMK
KGSGEQGRVMKDDVQNSKAPA
RVMKDDVQNSKAPAEAQAPVQ
SVAPSFAAAGKPQGDVEVVKI
GKPQGDVEVVKITRLRKAVSN
VEVVKITRLRKAVSNAMTRSK
KAVSNAMTRSKSIIPETVLMD
DALVNFRNEAKGLAESKGIKL
RNEAKGLAESKGIKLTYMAFI
AKGLAESKGIKLTYMAFIAKA
IKLTYMAFIAKAVLIALKEFP
FIAKAVLIALKEFPMFNASFN
FNHDTDEVYIKKFINLGMAVD
NHDTDEVYIKKFINLGMAVDT
TPDGLIVPNIKNADRLSVFEL
RSLADDTIARKISMDQQTGGT
YPELAILGIGKIDRKPWVVGN
AILGIGKIDRKPWVVGNEIKI
RKPWVVGNEIKIAHTLPLSLA
ADGGRFLMRVKELLTNPTLLL
GLTEAEIVSWKVAPGDSVAVN
ASVTHESEEPKAGAVIVGYGS
PPSGGGPVIAKPPIRKLAKDL
GPVIAKPPIRKLAKDLGVDLS
IAKPPIRKLAKDLGVDLSTVT
PDDREERILVKGVRKAIANAM
EERILVKGVRKAIANAMVTSA
VDATRTMEFVKRLKSAPDFVG
TRTMEFVKRLKSAPDFVGVKV
LKSAPDFVGVKVSPLLIMAKA
VKVSPLLIMAKAIVWAVRRNP
TPRGLIVPNVKEAQGMSLLEL
EELTLTAREGKTQPADMANGT
EVGIVALGTIKQKPWVVDGEV
GIVALGTIKQKPWVVDGEVRP
XXXXXMAIELKMPALSPTMEE
EEGTLTRWLVKEGDSIKAGEI
RWLVKEGDSIKAGEILAEIET
FEAVDEGVITKILIPEGSENV
ILIPEGSENVKVGTAIAYLGT
VTLDGASAETKAEESAPVASP
EESAPVASPAKTEAAAVEEAA
VEEAATPSLGKVINSAPEIPE
EEVAEYQGAYKVTQGLLQEFG
AIDHIINSAAKTHYMSGGQVR
VLAPYDAIDAKGLLKAAIRSD
YDAIDAKGLLKAAIRSDDPVV
VFLECELLYGKTFDVPKMDDF
LLYGKTFDVPKMDDFVLPIGK
KMDDFVLPIGKARIIREGKDV
IGKARIIREGKDVTIVSYSIG
FALTAAEALAKEGIDAEVIDL
IDLRTLRPLDKETILQSLAKT
DKETILQSLAKTNRIVTVEDG
TPTPYAENLEKKGLVNPEAII
PTPYAENLEKKGLVNPEAIIE
NPEAIIEAVRKVCYRKXXXXX
IEAVRKVCYRKXXXXXXXXXX
XXXXXXXXMLKHYIHQCVKAS
MLKHYIHQCVKASSCKHSLSV
IHQCVKASSCKHSLSVKQRYF
ASSCKHSLSVKQRYFHCSALN
SPTMEEGNITKWHFKEGDSFK
EEGNITKWHFKEGDSFKSGDI
KWHFKEGDSFKSGDILLEVET
VEVQDNGILAKVLIEKGSNIP
NGILAKVLIEKGSNIPVGKNI
IEKGSNIPVGKNIAIVADAED
AIVADAEDNLKDLELPKDEAS
EDNLKDLELPKDEASSEEQSF
SSEEQSFSSSKEEVKPIVQDR
QSFSSSKEEVKPIVQDRETKS
VKPIVQDRETKSNVEHKSTSQ
DRETKSNVEHKSTSQANDAVN
STSQANDAVNKSFLPSVSYLI
PSVSYLIHQYKIENPWSIPAT
PATGPHGRLLKGDVLAHVGKI
LKGDVLAHVGKIDKGVPSSLQ
DVLAHVGKIDKGVPSSLQKFV
IDKGVPSSLQKFVRNLEVLDF
EVLDFSGVEPKKPSYTEDSVP
VLDFSGVEPKKPSYTEDSVPV
SYTEDSVPVRKSTMIETLKTV
VRKSTMIETLKTVPMKDEYIT
MIETLKTVPMKDEYITFERSI
ITFERSISLEKLKSLLAKRKE
FERSISLEKLKSLLAKRKEKD
SLEKLKSLLAKRKEKDAFGID
EKLKSLLAKRKEKDAFGIDEV
LKSLLAKRKEKDAFGIDEVVS
GDALSISELSKVEPNSIESAY
YDLLLGAPIVKLKSSVSNFQP
LLLGAPIVKLKSSVSNFQPKL
LKSSVSNFQPKLFPKNNNTKD
VSNFQPKLFPKNNNTKDLHKY
PKLFPKNNNTKDLHKYIRDSM
PKNNNTKDLHKYIRDSMIGLP
GLPSNLSDYVKLNFSSVTKSS
YVKLNFSSVTKSSSNNVEFLD
TEDLTLTLSIKDNISKSRAIK
LTLSIKDNISKSRAIKFVDCL
KDNISKSRAIKFVDCLKSNFE
SRAIKFVDCLKSNFENPEFVL
GESVTEGTISKWLVAPGDKVN
ISKWLVAPGDKVNKYDPIAEV
WLVAPGDKVNKYDPIAEVMTD
QTLQVGEMICKIETEGANPAE
ETEGANPAEQKQEQPAASEAA
ASEAAENPVAKSAGAADQPNK
KSAGAADQPNKKRYSPAVLRL
SAGAADQPNKKRYSPAVLRLA
GTGAGGRITRKDIQRLIETGG
GVQEQNPEELKTAAPAPKSAS
EELKTAAPAPKSASKPEPKEE
TAAPAPKSASKPEPKEETSYP
APKSASKPEPKEETSYPASAA
TSYPASAAGDKEIPVTGVRKA
DKEIPVTGVRKAIASNMKRSK
GVRKAIASNMKRSKTEIPHAW
KAIASNMKRSKTEIPHAWTMM
TNMVAYRNSIKDSFKKTEGFN
AYRNSIKDSFKKTEGFNLTFF
YRNSIKDSFKKTEGFNLTFFA
FNLTFFAFFVKAVAQALKEFP
FFVKAVAQALKEFPQMNSMWA
PQMNSMWAGDKIIQKKDINIS
SMWAGDKIIQKKDINISIAVA
MWAGDKIIQKKDINISIAVAT
TEDSLFVPVIKNADEKTIKGI
FVPVIKNADEKTIKGIAKDIT
VIKNADEKTIKGIAKDITGLA
ADEKTIKGIAKDITGLAKKVR
GIAKDITGLAKKVRDGKLTAD
IAKDITGLAKKVRDGKLTADD
TGLAKKVRDGKLTADDMQGGT
AAILQVESIVKRPVVMDNGMI
LVCGRFLGRVKQILESIDEKT
VKQILESIDEKTSVYXXXXXX
XXXXMGTHVIKMPDIGEGIAE
PAAPVAATPEKPKEAPVAAPK
APVAATPEKPKEAPVAAPKAA
KPKEAPVAAPKAAAEAPRALR
QAVPVIGLRRKIAQKMQDAKR
VIGLRRKIAQKMQDAKRRIPH
RKIAQKMQDAKRRIPHFSYVE
LEALRAHLNQKWGGQRGKLTL
LNQKWGGQRGKLTLLPFLVRA
ARLAEAARSGKAQRQELSGST
MVVGGNIVVRKMMNLSSSFDH
FSNGLYHLDDKISSSNGVRSA
LITRMDDSSPKPILRFGVQNF
SPTMSHGNVVKWMKKEGDKVE
MSHGNVVKWMKKEGDKVEVGD
SHGNVVKWMKKEGDKVEVGDV
VVKWMKKEGDKVEVGDVLCEI
FESQEEGFLAKILVTEGSKDI
LAKILVTEGSKDIPVNEPIAI
AIMVEEEDDIKNVPATIEGGR
PATIEGGRDGKEETSAHQVMK
KEETSAHQVMKPDESTQQKSS
VMKPDESTQQKSSIQPDASDL
SPTMNQGNIAKWWKKEGDKIE
MNQGNIAKWWKKEGDKIEVGD
NQGNIAKWWKKEGDKIEVGDV
IAKWWKKEGDKIEVGDVIGEI
FESLEEGYLAKILIPEGSKDV
LAKILIPEGSKDVAVGKPIAL
PEGSKDVAVGKPIALIVEDAE
VEDAESIEAIKSSSAGSSEVD
SAGSSEVDTVKEVPDSVVDKP
VKEVPDSVVDKPTERKAGFTK
DSVVDKPTERKAGFTKISPAA
KPTERKAGFTKISPAAKLLIL
AGFTKISPAAKLLILEHGLEA
EASGPYGTLLKSDVVAAIASG
SDVVAAIASGKASKSSASTKK
VAAIASGKASKSSASTKKKQP
GKASKSSASTKKKQPSKETPS
KASKSSASTKKKQPSKETPSK
ASKSSASTKKKQPSKETPSKS
SASTKKKQPSKETPSKSSSTS
KKQPSKETPSKSSSTSKPSVT
ETPSKSSSTSKPSVTQSDNNY
YEDFPNSQIRKIIAKRLLESK
PNSQIRKIIAKRLLESKQKIP
KIIAKRLLESKQKIPHLYLQS
IAKRLLESKQKIPHLYLQSDV
VVLDPLLAFRKELQENHGVKV
RKELQENHGVKVSVNDIVIKA
VKVSVNDIVIKAVAVALRNVR
RQANAFWDAEKGDIVMCDSVD
VDISIAVATEKGLMTPIIKNA
TEKGLMTPIIKNADQKSISAI
MTPIIKNADQKSISAISLEVK
KSISAISLEVKELAQKARSGK
ISLEVKELAQKARSGKLAPHE
KELAQKARSGKLAPHEFQGGT
AGILAVGRGNKVVEPVIGLDG
EPVIGLDGIEKPSVVTKMNVT
DGIEKPSVVTKMNVTLSADHR
DLVEVIEILVKIGDQVKKDDS
EILVKIGDQVKKDDSLITVEG
ILVKIGDQVKKDDSLITVEGQ
EIPASHTGTIKNIIVHIGEKI
IKNIIVHIGEKITTGSLIAIL
AILNGIDDNVKSKNDSSSYSF
LNGIDDNVKSKNDSSSYSFKN
SKNDSSSYSFKNSKNTSTNSN
DSSSYSFKNSKNTSTNSNLGN
ATPTVRRLARKFDIKLENITG
VRRLARKFDIKLENITGTGRK
KLENITGTGRKGRILKEDVIS
TGTGRKGRILKEDVISYKNIS
RILKEDVISYKNISLFNDIKK
YKNISLFNDIKKSLKKTNVNY
KNISLFNDIKKSLKKTNVNYY
SLFNDIKKSLKKTNVNYYKDN
LFNDIKKSLKKTNVNYYKDNV
SLKKTNVNYYKDNVTCDDFKS
YKDNVTCDDFKSIELTRTQIR
ELTRTQIRSSKNLLKSWLTIP
TQIRSSKNLLKSWLTIPHVTQ
DITELENFRQKYNSDLKDKSK
NFRQKYNSDLKDKSKKLTILI
RQKYNSDLKDKSKKLTILIFV
KYNSDLKDKSKKLTILIFVIK
YNSDLKDKSKKLTILIFVIKA
KKLTILIFVIKAVSKALEMFP
ILIFVIKAVSKALEMFPKFNG
AVSKALEMFPKFNGRLINKDN
FPKFNGRLINKDNRIAIVLNE
LLVPVINRVNKKNISSISNDL
LVPVINRVNKKNISSISNDLR
RIISERARSRKLNFSDIKEYG
RSRKLNFSDIKEYGSFTISNL
IGGTNFTPIIKYPELAILGIS
AILGISRALIKPYWNSHAFIP
PYWNSHAFIPKLMLPLSLSYD
VAAVRFITFVKKMLTDIRFLM
AAVRFITFVKKMLTDIRFLMI
XXXXXXXXMSKQIQIPDIGSD
EVPAPEAGVVKEILVKVGDKV
EAGVVKEILVKVGDKVSTGTP
VKEILVKVGDKVSTGTPMLVL
EVPAPFGGVVKEILVKSGDKV
FGGVVKEILVKSGDKVSTGSL
VKEILVKSGDKVSTGSLIMRF
LAREFGVNLDKVKGTGRKGRI
REFGVNLDKVKGTGRKGRIVK
NLDKVKGTGRKGRIVKEDIEA
KGTGRKGRIVKEDIEAYVKTA
IVKEDIEAYVKTAVKAYESGA
DIEAYVKTAVKAYESGATAQA
GAGLGLLPWPKVDFSKFGEIE
LLPWPKVDFSKFGEIEEVELS
IEEVELSRINKISGANLHRNW
VIIPHVTHFDKADITDLEAFR
ADITDLEAFRKEQNALREKQK
FRKEQNALREKQKLGVKITPV
KEQNALREKQKLGVKITPVVF
ALREKQKLGVKITPVVFIMKA
VKITPVVFIMKAVAKALEAYP
PVVFIMKAVAKALEAYPRFNS
ITEDAQRLILKKYINIGVAVD
TEDAQRLILKKYINIGVAVDT
TPNGLVVPVFKNVNKKGIIEL
LVVPVFKNVNKKGIIELSREL
VVPVFKNVNKKGIIELSRELM
ELSRELMEVSKKAREGKLTAS
LSRELMEVSKKAREGKLTASD
MEVSKKAREGKLTASDMQGGC
APEVAILGVSKSSMEPVWNGK
KSSMEPVWNGKEFAPRLILPM
XXXXMLSAISKVSTLKSCTRY
LSAISKVSTLKSCTRYLTKCN
TLKSCTRYLTKCNYHASAKLL
LTKCNYHASAKLLAVKTFSMP
YHASAKLLAVKTFSMPAMSPT
SMPAMSPTMEKGGIVSWKYKV
TMEKGGIVSWKYKVGEPFSAG
EKGGIVSWKYKVGEPFSAGDV
QIDVEALDDGKLAKILKDEGS
VEALDDGKLAKILKDEGSKDV
LDDGKLAKILKDEGSKDVDVG
LAKILKDEGSKDVDVGEPIAY
ADVDDDLATIKLPQEANTANA
LPQEANTANAKSIEIKKPSAD
NTANAKSIEIKKPSADSTEAT
TANAKSIEIKKPSADSTEATQ
DSTEATQQHLKKATVTPIKTV
STEATQQHLKKATVTPIKTVD
HLKKATVTPIKTVDGSQANLE
SLLLAENNISKQKALKEIAPS
LLAENNISKQKALKEIAPSGS
ENNISKQKALKEIAPSGSNGR
APSGSNGRLLKGDVLAYLGKI
LKGDVLAYLGKIPQDSVNKVT
LGKIPQDSVNKVTEFIKKNER
DSVNKVTEFIKKNERLDLSNI
SVNKVTEFIKKNERLDLSNIK
KNERLDLSNIKPIQLKPKIAE
DLSNIKPIQLKPKIAEQAQTK
SNIKPIQLKPKIAEQAQTKAA
KPKIAEQAQTKAADKPKITPV
AEQAQTKAADKPKITPVEFEE
QAQTKAADKPKITPVEFEEQL
FHAPASIPFDKLSESLNSFMK
KLSESLNSFMKEAYQFSHGTP
HGTPLMDTNSKYFDPIFEDLV
VTLSPREPRFKFSYDLMQIPK
KFSYDLMQIPKANNMQDTYGQ
ATASSVRPVEKNLPEKNEYIL
VRPVEKNLPEKNEYILALNVS
ILALNVSVNNKKFNDAEAKAK
LALNVSVNNKKFNDAEAKAKR
NNKKFNDAEAKAKRFLDYVRE
KKFNDAEAKAKRFLDYVRELE
XXXXXXXXMLKTLRFGTRAFG
RAFGQNLNIAKRNFCTRYTND
YRLGITDFAQKQLGDIVFVEI
PMGDGWIVEYKSSKTDQFQSL
DGWIVEYKSSKTDQFQSLMNK
KTDQFQSLMNKAQYDEYIKEH
MNKAQYDEYIKEHXXXXXXXX
XXXXXXXMAEKVEEYRGCVIP
VEEYRGCVIPKDLYYDIENQV
YYDIENQVWFKVNEDGTVTVG
VTDIGQARAGKIINIRIKPPG
RAGKIINIRIKPPGKYVKKGK
IINIRIKPPGKYVKKGKPVAS
IRIKPPGKYVKKGKPVASLES
RIKPPGKYVKKGKPVASLESG
KPPGKYVKKGKPVASLESGKW
IEGEVVERNEKLFDKPDLINE
VVERNEKLFDKPDLINEDPYG
EDPYGEGWIAKLKPANLERDL
PYGEGWIAKLKPANLERDLQD
DLVTGEEAVQKLKEYIEREDV
VTGEEAVQKLKEYIEREDVNC
NCGEERAQISKKFYKXXXXXX
CGEERAQISKKFYKXXXXXXX
ERAQISKKFYKXXXXXXXXXX
MSIPQELYYTKDHEWLRKEGD
YYTKDHEWLRKEGDEVVIGIT
PELVNEDPYGKGWMLRLKPED
PYGKGWMLRLKPEDPAQMDAL
XXXXXXXXXMKKIANYLLIEK
XXXXXXXXMKKIANYLLIEKT
KKIANYLLIEKTDDRYTISMT
TLTPTLLNSEKAEENWIVVLT
XXXXXXXXXMKISFFNFPDDL
LYEPERHVWIKVEENKVVSVG
RHVWIKVEENKVVSVGMTDLG
MTDLGQYLAGKIFQVSVPRRV
FSVESAKWIGKIRLQIEGEVV
EVVDINERVIKNPSIINEDPY
NEDPYGSWIIKVSVTDVDLVK
KVSVTDVDLVKRAFKNIQDCR
TDVDLVKRAFKNIQDCRSQFE
EEEANRIVSWKNSSXXXXXXX
XXXXXXXXXMKGQKYYSDYHV
XXXXXXMKGQKYYSDYHVWIE
WIEPIHSRIVKLGLSSQMREH
IDLPSVGSFIKEGEELCILES
EDPYEEGWFIKVRVDNLDDEM
EDFYVEDYLVKGDRYYTKEHE
YLVKGDRYYTKEHEWVRVKNG
YTKEHEWVRVKNGFAEVGITD
AEVGITDYAQKQLGDIVYVDL
GDIVYVDLPEKGKEVDAGDTL
IVYVDLPEKGKEVDAGDTLAN
GTVVEVNEDLKDEPGIINDDP
EAGWIAVIEMKDPTEVEDLMT
MTAQDYAEYLKEIVEEEKEEE
EYLKEIVEEEKEEEVEVKEEE
EEEKEEEVEVKEEELIETESI
SEEELGYEENKXXXXXXXXXX
PLISPVAGTVKYVNRDVADDP
GDPYGEGWLLKVELDDDEPEL
PELLSADEYAKVVRXXXXXXX
VSIQMAGNLWKVHVKAGDQIE
MAGNLWKVHVKAGDQIEKGQE
VHVKAGDQIEKGQEVAILESM
PIVADRSGIVKEVKKKEGDFV
ADRSGIVKEVKKKEGDFVNEG
DRSGIVKEVKKKEGDFVNEGD
RSGIVKEVKKKEGDFVNEGDV
XXXXXXXMAVKVVMPKLGMAM
XXMAVKVVMPKLGMAMKQGEV
VVMPKLGMAMKQGEVSIWNKK
MKQGEVSIWNKKVGDPVEKGE
KQGEVSIWNKKVGDPVEKGES
WNKKVGDPVEKGESIASIQSE
KIEMEIEAPEKGTLIDIKVKE
APEKGTLIDIKVKEGEEVPPG
EKGTLIDIKVKEGEEVPPGTA
DNMPQAVQPVKQENKPAASKK
QAVQPVKQENKPAASKKDRMK
VKQENKPAASKKDRMKISPVA
KQENKPAASKKDRMKISPVAR
KPAASKKDRMKISPVARKIAE
DRMKISPVARKIAEKAGLDLK
ISPVARKIAEKAGLDLKQLKG
KIAEKAGLDLKQLKGTGPGGR
EKAGLDLKQLKGTGPGGRIVK
KGTGPGGRIVKDDVTKALAEQ
GGRIVKDDVTKALAEQKKDQA
DDVTKALAEQKKDQAKPVSEQ
DVTKALAEQKKDQAKPVSEQK
ALAEQKKDQAKPVSEQKAQEI
KDQAKPVSEQKAQEIPVTGMR
AQEIPVTGMRKVIAARMQESL
ANSAQLTITMKADITKLATLQ
LTITMKADITKLATLQKQLSP
ADITKLATLQKQLSPTAEERY
SPTAEERYGTKLTITHFVSRA
LVVPVIRHAEKLSLIELAQSI
ELAQSISENAKKAREGRAGSE
LAQSISENAKKAREGRAGSEE
CDGAPAAAFLKAMKTYLEEPA
APAAAFLKAMKTYLEEPAALI
SPTIIPIVMPKWGLSMKEGTV
IVMPKWGLSMKEGTVNAWLVD
EAPDAGTLRRKVAQAGDVLPV
VAQAGDVLPVKALLGVLAPAE
VDGIRVRYARKGGGAETVLFI
FVSAQSRRELKPVVELLFADA
RQMLDDLLRYKRLDGVTEALT
QPGQRLANSGKRVLVVWGGQD
AEAAPPGATVKVFADAGHMSQ
ADAGHMSQMEKANDFNALLKK
EKANDFNALLKKHLGGXXXXX
KANDFNALLKKHLGGXXXXXX
EPYRMLFQWVKDEGNGIYSVG
AALAYPLYSIKIKPVGTKLEY
LAYPLYSIKIKPVGTKLEYDE
YSIKIKPVGTKLEYDEALAII
IVVDVNEEVIKNPELINKKPY
EVIKNPELINKKPYSSWIAKL
VIKNPELINKKPYSSWIAKLK
NKKPYSSWIAKLKATNLEEVK
KPYSSWIAKLKATNLEEVKNL
KLKATNLEEVKNLQSAKEIVK
LEEVKNLQSAKEIVKTVKDFI
KNLQSAKEIVKTVKDFIILED
QSAKEIVKTVKDFIILEDVDC
XXXXMISNFLKSNNIKNNSPF
ISNFLKSNNIKNNSPFRSFCT
TRYSESHEWIKFNHRNKTCTL
HEWIKFNHRNKTCTLGITKYA
RNKTCTLGITKYASDQLKSIV
GITKYASDQLKSIVNINLPDL
LPDLNSTITRKQPFGNIESTK
VADLFSDVDGKAVLLNSDVIV
PTIVSHSPEDKGWLIKMESND
HSPEDKGWLIKMESNDFESFN
MESNDFESFNKMMTKSEYGQF
DFESFNKMMTKSEYGQFLKDI
MTKSEYGQFLKDINKSNVXXX
EYGQFLKDINKSNVXXXXXXX
XXXMNSQDTFKFAETHEWADQ
LGDVMFFQAPKLDQQVKQGEA
FQAPKLDQQVKQGEAIAVIES
NEEPYGIWLFKINRPLMRFLY
YPTRCALEFRKILCRPWRLII
ILCRPWRLIIKLKWGRAQLTS
CRPWRLIIKLKWGRAQLTSEC
GFLPSLTSSVKTGFCLKAAAP
TSSVKTGFCLKAAAPTLSMKW
LKAAAPTLSMKWSAVKYYSTK
PTLSMKWSAVKYYSTKHFTKE
KWSAVKYYSTKHFTKEHEWVK
VKYYSTKHFTKEHEWVKVDGD
KHFTKEHEWVKVDGDVGTVGI
INESLGDSPDKVSSSPEEEGW
SSPEEEGWICKIKLSSPDELK
PEEEGWICKIKLSSPDELKSL
KIKLSSPDELKSLLNDESYAQ
LNDESYAQFCKEEDASHXXXX
