# Supplementary material for: LipoFNT: Lipoylation Sites Identification with Flexible Neural Tree
Source: Hindawi journal article supplement (doi:10.1155/2019/1603867), 2019-01-01
Supplement: f1 [file 1603867.f1.zip › supplementary/DATA/positive samples.txt]

GDALCEIETDKAVVTLDASDD
FQPLCEVQSDKATIEITSRFK
FDSICEVQSDKASVTITSRYD
GDLIAEVETDKATVGFESLEE
GDLLAEIETDKATIGFEVQEE
QDEFGALESVKAASELYSPLS
GESVVVVESDKADMDVETFYD
DEAIAQIETDKVTIDIASPAS
GESLGSIESVKSASEIYQPAD
DEPLLEVSTDKVDTEIPSPVA
DEPLLEVSTDKVDTEIPSPVA
DEPLLEVSTDKVDTEIPSPVA
NQTLCSVETAKAEVEIPSPYA
DDNIVDIETDKVMLEVSSPCD
DEEIASVETDKIDAPVTAPDA
GEAILELETDKVNVEVVSEEA
GQSLYFVETDKVNSEIPAPVA
EQGLVVLESAKASMEVPSPKA
EQSLIVLESDKASMEIPSPAS
EQSLIVLESDKASMEIPSPAA
DEALFVVETDKVTTELPSPYA
GEVIAEIETDKATMEVESVDE
DDVLAEVQNDKSVVEIPSPVS
GETLVIVETDKVNAELPSPVD
GETLVVVETDKVNAELPSPVD
NQVIVEIETAKSLVELPSPFE
GEILAEIETDKAIMEFEAVDE
GDILLEVETDKATMDVEVQDN
YDPIAEVMTDKVNAEVPSSFT
DQVLAEVMTDKATVEIPSPVA
GDVLCEIETDKATVEFESQEE
GDVIGEIETDKATLEFESLEE
DDSLITVEGQKASIEIPASHT
DQSIINVEGDKASMEVPAPEA
EQSLITVEGDKASMEVPAPFG
GDVILEVETDKSQIDVEALDD
GQPITVVESVKAASDIYIPMD
GKPVASLESGKWAGPVPADIE
GGTFGVVESVKAASDLFSPIT
DDIILNLEASKTVMSVLSPLA
RTILFSVESAKWIGKIRLQIE
GEELCILESSKSAIEVLSPVS
GETFGSIESVKAVEDLYAPIS
GDTLANIESVKNVAPVYAPVT
GDEIVELESSKAVQPLISPVA
GQEVAILESMKMEIPIVADRS
GESIASIQSEKIEMEIEAPEK
GLPILDVETDKIANAVEAPDA
DEALAIIEAGKRVATFPTPLS
KQPFGNIESTKTVADLFSDVD
GEAIAVIESVKAASDIHAPVS
GDGIGAVESVKSASDVYSPVS
