# Supplementary material for: LipoFNT: Lipoylation Sites Identification with Flexible Neural Tree
Source: Hindawi journal article supplement (doi:10.1155/2019/1603867), 2019-01-01
Supplement: f1 [file 1603867.f1.zip › supplementary/S1.docx]

#### Table S1 The Performances of Different Features in 19

| Features | Sn(%) | Sp(%) | Acc(%) | F1 | MCC |
| --- | --- | --- | --- | --- | --- |
| Binary Encoding | 53.94 | 72.29 | 63.12 | 0.5939 | 0.2669 |
| AA Composition | 62.42 | 59.28 | 60.85 | 0.6146 | 0.2172 |
| Grouping AA Composition | 69.36 | 68.53 | 68.95 | 0.6908 | 0.3790 |
| Physicochemical Properties | 73.11 | 70.42 | 71.77 | 0.7214 | 0.4355 |
| KNN Features | 72.52 | 62.34 | 67.43 | 0.6901 | 0.3505 |
| Secondary Tendency Structure | 67.54 | 73.89 | 70.72 | 0.6976 | 0.4152 |
| PSSM | 68.78 | 75.88 | 72.33 | 0.7131 | 0.4478 |
| BPB | 70.39 | 75.00 | 72.70 | 0.7205 | 0.4544 |
| Bi-gram | 72.75 | 73.30 | 73.03 | 0.7295 | 0.4606 |
| Tri-gram | 74.86 | 74.76 | 74.81 | 0.7482 | 0.4962 |
| Proposed Algorithm | 78.65 | 76.78 | 77.72 | 0.7792 | 0.5544 |

#### Table S2 The Performances of Different Methods in 19

| *Method* | *Sn(%)* | *Sp(%)* | *Acc(%)* | *F1* | *MCC* |
| --- | --- | --- | --- | --- | --- |
| DNABIND65 | 67.36 | 67.46 | 67.41 | 0.6740 | 0.3482 |
| DNAbinder65 | 67.47 | 70.28 | 68.88 | 0.6843 | 0.3777 |
| DBD-Threader66 | 55.37 | 91.20 | 73.29 | 0.6746 | 0.4989 |
| DNA-Prot66 | 65.39 | 77.20 | 71.30 | 0.6950 | 0.4290 |
| iDNA-Prot67 | 74.29 | 72.01 | 73.15 | 0.7345 | 0.4632 |
| DBPPred68 | 76.95 | 71.31 | 74.13 | 0.7484 | 0.4834 |
| PLMLA69 | 63.38 | 66.20 | 64.79 | 0.6429 | 0.2960 |
| Phosida70 | 76.19 | 81.40 | 78.80 | 0.7823 | 0.5767 |
| LysAcet71 | 75.08 | 71.63 | 73.36 | 0.7381 | 0.4674 |
| EnsemblePail72 | 74.89 | 68.73 | 71.81 | 0.7265 | 0.4371 |
| PSKAcePred73 | 68.78 | 66.36 | 67.57 | 0.6796 | 0.3516 |
| BRABSB74 | 78.67 | 68.77 | 73.72 | 0.7496 | 0.4768 |
| SSPKA75 | 73.39 | 76.06 | 74.73 | 0.7438 | 0.4947 |
| Proposed Algorithm | 78.65 | 76.78 | 77.72 | 0.7792 | 0.5544 |

#### Table S3 The Performances of Different Features in 23

| Features | Sn(%) | Sp(%) | Acc(%) | F1 | MCC |
| --- | --- | --- | --- | --- | --- |
| Binary Encoding | 56.36 | 75.80 | 66.08 | 0.6243 | 0.3279 |
| AA Composition | 64.84 | 62.79 | 63.82 | 0.6418 | 0.2764 |
| Grouping AA Composition | 71.78 | 72.04 | 71.91 | 0.7187 | 0.4382 |
| Physicochemical Properties | 75.53 | 73.93 | 74.73 | 0.7493 | 0.4947 |
| KNN Features | 74.94 | 65.85 | 70.40 | 0.7168 | 0.4096 |
| Secondary Tendency Structure | 69.96 | 77.40 | 73.68 | 0.7266 | 0.4749 |
| PSSM | 71.20 | 79.39 | 75.30 | 0.7424 | 0.5076 |
| BPB | 72.81 | 78.51 | 75.66 | 0.7495 | 0.5140 |
| Bi-gram | 75.17 | 76.81 | 75.99 | 0.7579 | 0.5199 |
| Tri-gram | 77.28 | 78.27 | 77.78 | 0.7766 | 0.5555 |
| Proposed Algorithm | 81.07 | 80.29 | 80.68 | 0.8076 | 0.6136 |

#### Table S4 The Performances of Different Methods in 23

| *Method* | *Sn(%)* | *Sp(%)* | *Acc(%)* | *F1* | *MCC* |
| --- | --- | --- | --- | --- | --- |
| DNABIND65 | 69.78 | 70.97 | 70.38 | 0.7020 | 0.4075 |
| DNAbinder65 | 69.89 | 73.79 | 71.84 | 0.7128 | 0.4371 |
| DBD-Threader66 | 57.79 | 94.71 | 76.25 | 0.7087 | 0.5649 |
| DNA-Prot66 | 67.81 | 80.71 | 74.26 | 0.7249 | 0.4893 |
| iDNA-Prot67 | 76.71 | 75.52 | 76.12 | 0.7626 | 0.5223 |
| DBPPred68 | 79.37 | 74.82 | 77.10 | 0.7760 | 0.5425 |
| PLMLA69 | 65.80 | 69.71 | 67.76 | 0.6711 | 0.3554 |
| Phosida70 | 78.61 | 84.91 | 81.76 | 0.8117 | 0.6365 |
| LysAcet71 | 77.50 | 75.14 | 76.32 | 0.7660 | 0.5265 |
| EnsemblePail72 | 77.31 | 72.24 | 74.78 | 0.7540 | 0.4961 |
| PSKAcePred73 | 71.20 | 69.87 | 70.54 | 0.7073 | 0.4107 |
| BRABSB74 | 81.09 | 72.28 | 76.65 | 0.7762 | 0.5349 |
| SSPKA75 | 75.81 | 79.57 | 77.69 | 0.7726 | 0.5542 |
| Proposed Algorithm | 81.07 | 80.29 | 80.68 | 0.8076 | 0.6136 |

#### Table S5 The Performances of Different Features in 25

| Features | Sn(%) | Sp(%) | Acc(%) | F1 | MCC |
| --- | --- | --- | --- | --- | --- |
| Binary Encoding | 56.16 | 74.09 | 65.13 | 0.6169 | 0.3075 |
| AA Composition | 64.64 | 61.08 | 62.86 | 0.6351 | 0.2574 |
| Grouping AA Composition | 71.58 | 70.33 | 70.96 | 0.7114 | 0.4192 |
| Physicochemical Properties | 75.33 | 72.22 | 73.78 | 0.7418 | 0.4758 |
| KNN Features | 74.74 | 64.14 | 69.44 | 0.7098 | 0.3910 |
| Secondary Tendency Structure | 69.76 | 75.69 | 72.73 | 0.7189 | 0.4553 |
| PSSM | 71.00 | 77.68 | 74.34 | 0.7345 | 0.4879 |
| BPB | 72.61 | 76.80 | 74.71 | 0.7416 | 0.4946 |
| Bi-gram | 74.97 | 75.10 | 75.04 | 0.7502 | 0.5007 |
| Tri-gram | 77.08 | 76.56 | 76.82 | 0.7688 | 0.5364 |
| Proposed Algorithm | 80.87 | 78.58 | 79.73 | 0.7996 | 0.5947 |

#### Table S6 The Performances of Different Methods in 25

| *Method* | *Sn(%)* | *Sp(%)* | *Acc(%)* | *F1* | *MCC* |
| --- | --- | --- | --- | --- | --- |
| DNABIND65 | 69.58 | 69.26 | 69.42 | 0.6947 | 0.3884 |
| DNAbinder65 | 69.69 | 72.08 | 70.89 | 0.7053 | 0.4178 |
| DBD-Threader66 | 57.59 | 93.00 | 75.30 | 0.6998 | 0.5410 |
| DNA-Prot66 | 67.61 | 79.00 | 73.31 | 0.7169 | 0.4692 |
| iDNA-Prot67 | 76.51 | 73.81 | 75.16 | 0.7549 | 0.5034 |
| DBPPred68 | 79.17 | 73.11 | 76.14 | 0.7684 | 0.5238 |
| PLMLA69 | 65.60 | 68.00 | 66.80 | 0.6640 | 0.3361 |
| Phosida70 | 78.41 | 83.20 | 80.81 | 0.8034 | 0.6168 |
| LysAcet71 | 77.30 | 73.43 | 75.37 | 0.7583 | 0.5077 |
| EnsemblePail72 | 77.11 | 70.53 | 73.82 | 0.7465 | 0.4775 |
| PSKAcePred73 | 71.00 | 68.16 | 69.58 | 0.7001 | 0.3918 |
| BRABSB74 | 80.89 | 70.57 | 75.73 | 0.7692 | 0.5174 |
| SSPKA75 | 75.61 | 77.86 | 76.74 | 0.7647 | 0.5349 |
| Proposed Algorithm | 80.87 | 78.58 | 79.73 | 0.7996 | 0.5947 |
