# Supplementary material for: LipoFNT: Lipoylation Sites Identification with Flexible Neural Tree
Source: Hindawi journal article supplement (doi:10.1155/2019/1603867), 2019-01-01
Supplement: f1 [file 1603867.f1.zip › supplementary/Supplementary material.pdf]

**Table S1 The Performances of Different Features in 19**

| Features                     | Sn(%) | Sp(%) | Acc(%) | F1     | MCC    |
|------------------------------|-------|-------|--------|--------|--------|
| Binary Encoding              | 53.94 | 72.29 | 63.12  | 0.5939 | 0.2669 |
| AA Composition               | 62.42 | 59.28 | 60.85  | 0.6146 | 0.2172 |
| Grouping AA Composition      | 69.36 | 68.53 | 68.95  | 0.6908 | 0.3790 |
| Physicochemical Properties   | 73.11 | 70.42 | 71.77  | 0.7214 | 0.4355 |
| KNN Features                 | 72.52 | 62.34 | 67.43  | 0.6901 | 0.3505 |
| Secondary Tendency Structure | 67.54 | 73.89 | 70.72  | 0.6976 | 0.4152 |
| PSSM                         | 68.78 | 75.88 | 72.33  | 0.7131 | 0.4478 |
| BPB                          | 70.39 | 75.00 | 72.70  | 0.7205 | 0.4544 |
| Bi-gram                      | 72.75 | 73.30 | 73.03  | 0.7295 | 0.4606 |
| Tri-gram                     | 74.86 | 74.76 | 74.81  | 0.7482 | 0.4962 |
| Proposed Algorithm           | 78.65 | 76.78 | 77.72  | 0.7792 | 0.5544 |

**Table S2 The Performances of Different Methods in 19**

| <i>Method</i>              | <i>Sn(%)</i> | <i>Sp(%)</i> | <i>Acc(%)</i> | <i>F1</i> | <i>MCC</i> |
|----------------------------|--------------|--------------|---------------|-----------|------------|
| DNABIND <sup>65</sup>      | 67.36        | 67.46        | 67.41         | 0.6740    | 0.3482     |
| DNAbinder <sup>65</sup>    | 67.47        | 70.28        | 68.88         | 0.6843    | 0.3777     |
| DBD-Threader <sup>66</sup> | 55.37        | 91.20        | 73.29         | 0.6746    | 0.4989     |
| DNA-Prot <sup>66</sup>     | 65.39        | 77.20        | 71.30         | 0.6950    | 0.4290     |
| iDNA-Prot <sup>67</sup>    | 74.29        | 72.01        | 73.15         | 0.7345    | 0.4632     |
| DBPPred <sup>68</sup>      | 76.95        | 71.31        | 74.13         | 0.7484    | 0.4834     |
| PLMLA <sup>69</sup>        | 63.38        | 66.20        | 64.79         | 0.6429    | 0.2960     |
| Phosida <sup>70</sup>      | 76.19        | 81.40        | 78.80         | 0.7823    | 0.5767     |
| LysAcet <sup>71</sup>      | 75.08        | 71.63        | 73.36         | 0.7381    | 0.4674     |
| EnsemblePail <sup>72</sup> | 74.89        | 68.73        | 71.81         | 0.7265    | 0.4371     |
| PSKAcePred <sup>73</sup>   | 68.78        | 66.36        | 67.57         | 0.6796    | 0.3516     |
| BRABSB <sup>74</sup>       | 78.67        | 68.77        | 73.72         | 0.7496    | 0.4768     |
| SSPKA <sup>75</sup>        | 73.39        | 76.06        | 74.73         | 0.7438    | 0.4947     |
| Proposed Algorithm         | 78.65        | 76.78        | 77.72         | 0.7792    | 0.5544     |

**Table S3 The Performances of Different Features in 23**

| Features                   | Sn(%) | Sp(%) | Acc(%) | F1     | MCC    |
|----------------------------|-------|-------|--------|--------|--------|
| Binary Encoding            | 56.36 | 75.80 | 66.08  | 0.6243 | 0.3279 |
| AA Composition             | 64.84 | 62.79 | 63.82  | 0.6418 | 0.2764 |
| Grouping AA Composition    | 71.78 | 72.04 | 71.91  | 0.7187 | 0.4382 |
| Physicochemical Properties | 75.53 | 73.93 | 74.73  | 0.7493 | 0.4947 |

|                              |       |       |       |        |        |
|------------------------------|-------|-------|-------|--------|--------|
| KNN Features                 | 74.94 | 65.85 | 70.40 | 0.7168 | 0.4096 |
| Secondary Tendency Structure | 69.96 | 77.40 | 73.68 | 0.7266 | 0.4749 |
| PSSM                         | 71.20 | 79.39 | 75.30 | 0.7424 | 0.5076 |
| BPB                          | 72.81 | 78.51 | 75.66 | 0.7495 | 0.5140 |
| Bi-gram                      | 75.17 | 76.81 | 75.99 | 0.7579 | 0.5199 |
| Tri-gram                     | 77.28 | 78.27 | 77.78 | 0.7766 | 0.5555 |
| Proposed Algorithm           | 81.07 | 80.29 | 80.68 | 0.8076 | 0.6136 |

**Table S4 The Performances of Different Methods in 23**

| <i>Method</i>              | <i>Sn(%)</i> | <i>Sp(%)</i> | <i>Acc(%)</i> | <i>F1</i> | <i>MCC</i> |
|----------------------------|--------------|--------------|---------------|-----------|------------|
| DNABIND <sup>65</sup>      | 69.78        | 70.97        | 70.38         | 0.7020    | 0.4075     |
| DNAbinder <sup>65</sup>    | 69.89        | 73.79        | 71.84         | 0.7128    | 0.4371     |
| DBD-Threader <sup>66</sup> | 57.79        | 94.71        | 76.25         | 0.7087    | 0.5649     |
| DNA-Prot <sup>66</sup>     | 67.81        | 80.71        | 74.26         | 0.7249    | 0.4893     |
| iDNA-Prot <sup>67</sup>    | 76.71        | 75.52        | 76.12         | 0.7626    | 0.5223     |
| DBPPred <sup>68</sup>      | 79.37        | 74.82        | 77.10         | 0.7760    | 0.5425     |
| PLMLA <sup>69</sup>        | 65.80        | 69.71        | 67.76         | 0.6711    | 0.3554     |
| Phosida <sup>70</sup>      | 78.61        | 84.91        | 81.76         | 0.8117    | 0.6365     |
| LysAcet <sup>71</sup>      | 77.50        | 75.14        | 76.32         | 0.7660    | 0.5265     |
| EnsemblePail <sup>72</sup> | 77.31        | 72.24        | 74.78         | 0.7540    | 0.4961     |
| PSKAcePred <sup>73</sup>   | 71.20        | 69.87        | 70.54         | 0.7073    | 0.4107     |
| BRABSB <sup>74</sup>       | 81.09        | 72.28        | 76.65         | 0.7762    | 0.5349     |
| SSPKA <sup>75</sup>        | 75.81        | 79.57        | 77.69         | 0.7726    | 0.5542     |
| Proposed Algorithm         | 81.07        | 80.29        | 80.68         | 0.8076    | 0.6136     |

**Table S5 The Performances of Different Features in 25**

| Features                     | Sn(%) | Sp(%) | Acc(%) | F1     | MCC    |
|------------------------------|-------|-------|--------|--------|--------|
| Binary Encoding              | 56.16 | 74.09 | 65.13  | 0.6169 | 0.3075 |
| AA Composition               | 64.64 | 61.08 | 62.86  | 0.6351 | 0.2574 |
| Grouping AA Composition      | 71.58 | 70.33 | 70.96  | 0.7114 | 0.4192 |
| Physicochemical Properties   | 75.33 | 72.22 | 73.78  | 0.7418 | 0.4758 |
| KNN Features                 | 74.74 | 64.14 | 69.44  | 0.7098 | 0.3910 |
| Secondary Tendency Structure | 69.76 | 75.69 | 72.73  | 0.7189 | 0.4553 |
| PSSM                         | 71.00 | 77.68 | 74.34  | 0.7345 | 0.4879 |
| BPB                          | 72.61 | 76.80 | 74.71  | 0.7416 | 0.4946 |
| Bi-gram                      | 74.97 | 75.10 | 75.04  | 0.7502 | 0.5007 |
| Tri-gram                     | 77.08 | 76.56 | 76.82  | 0.7688 | 0.5364 |
| Proposed Algorithm           | 80.87 | 78.58 | 79.73  | 0.7996 | 0.5947 |

**Table S6 The Performances of Different Methods in 25**

| <i>Method</i>              | <i>Sn(%)</i> | <i>Sp(%)</i> | <i>Acc(%)</i> | <i>F1</i> | <i>MCC</i> |
|----------------------------|--------------|--------------|---------------|-----------|------------|
| DNABIND <sup>65</sup>      | 69.58        | 69.26        | 69.42         | 0.6947    | 0.3884     |
| DNAbinder <sup>65</sup>    | 69.69        | 72.08        | 70.89         | 0.7053    | 0.4178     |
| DBD-Threader <sup>66</sup> | 57.59        | 93.00        | 75.30         | 0.6998    | 0.5410     |
| DNA-Prot <sup>66</sup>     | 67.61        | 79.00        | 73.31         | 0.7169    | 0.4692     |
| iDNA-Prot <sup>67</sup>    | 76.51        | 73.81        | 75.16         | 0.7549    | 0.5034     |
| DBPPred <sup>68</sup>      | 79.17        | 73.11        | 76.14         | 0.7684    | 0.5238     |
| PLMLA <sup>69</sup>        | 65.60        | 68.00        | 66.80         | 0.6640    | 0.3361     |
| Phosida <sup>70</sup>      | 78.41        | 83.20        | 80.81         | 0.8034    | 0.6168     |
| LysAcet <sup>71</sup>      | 77.30        | 73.43        | 75.37         | 0.7583    | 0.5077     |
| EnsemblePail <sup>72</sup> | 77.11        | 70.53        | 73.82         | 0.7465    | 0.4775     |
| PSKAcePred <sup>73</sup>   | 71.00        | 68.16        | 69.58         | 0.7001    | 0.3918     |
| BRABSB <sup>74</sup>       | 80.89        | 70.57        | 75.73         | 0.7692    | 0.5174     |
| SSPKA <sup>75</sup>        | 75.61        | 77.86        | 76.74         | 0.7647    | 0.5349     |
| Proposed Algorithm         | 80.87        | 78.58        | 79.73         | 0.7996    | 0.5947     |

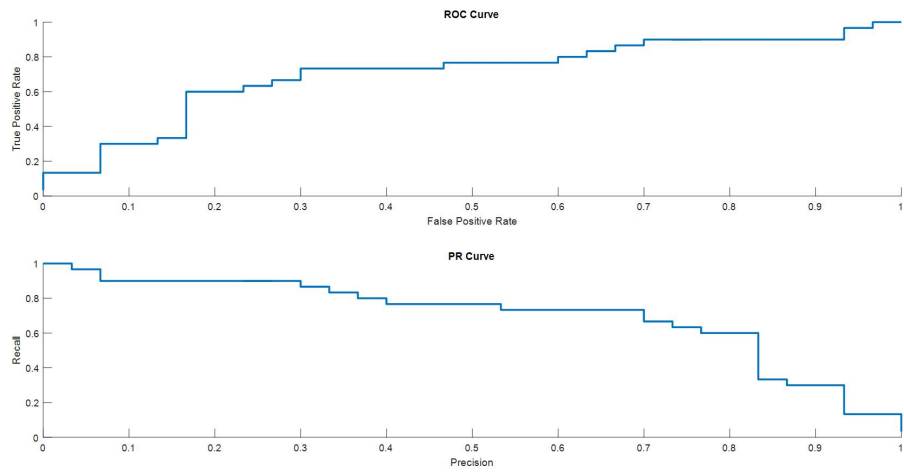

**Figure S1 The ROC and Recall Curves of Length=3**

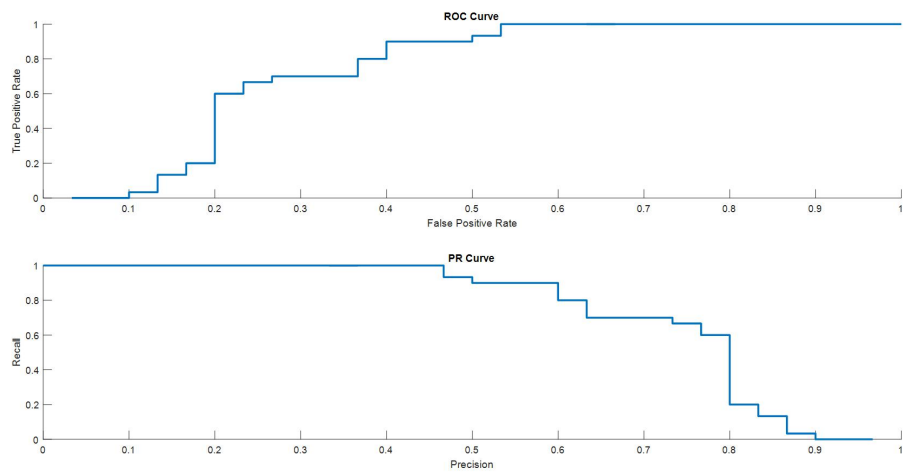

**Figure S2 The ROC and Recall Curves of Length=5**

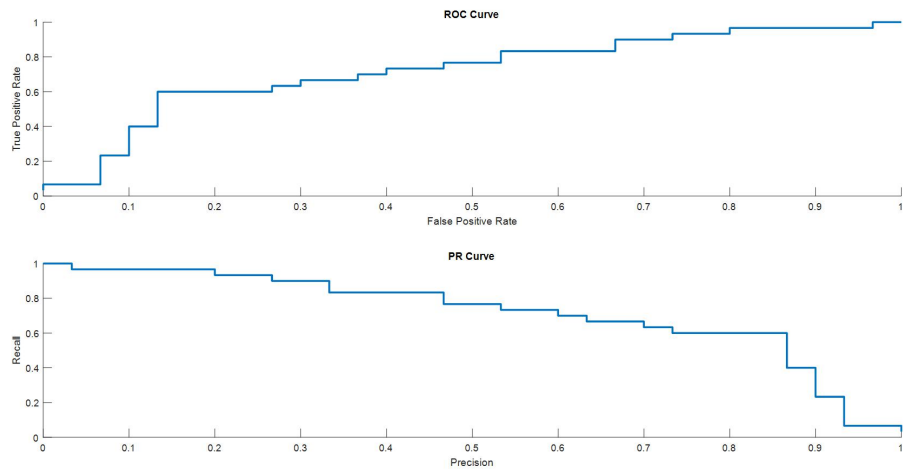

**Figure S3 The ROC and Recall Curves of Length=7**

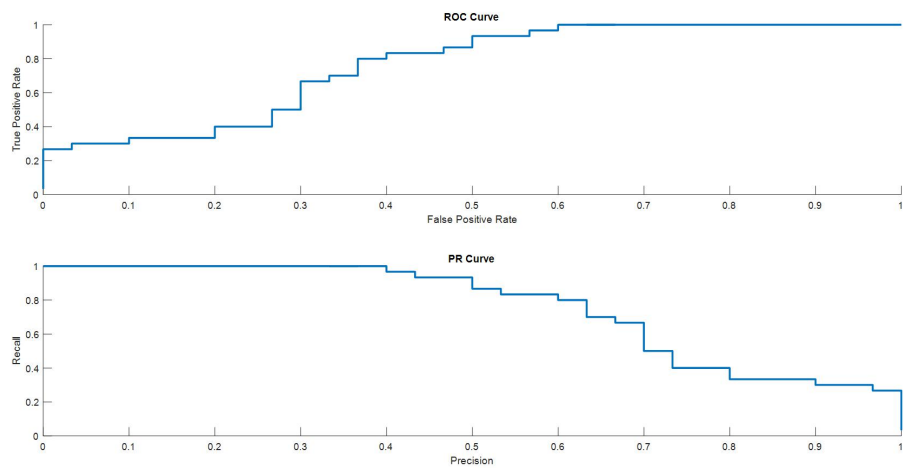

**Figure S4 The ROC and Recall Curves of Length=9**

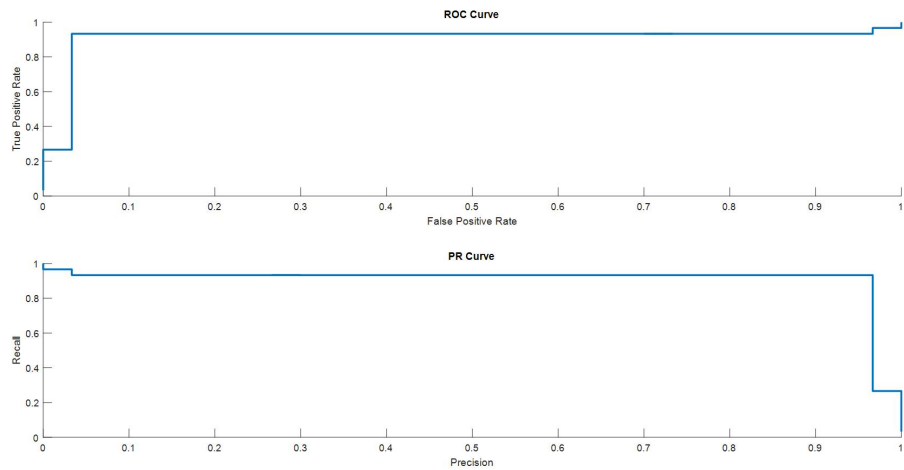

**Figure S5 The ROC and Recall Curves of Length=11**

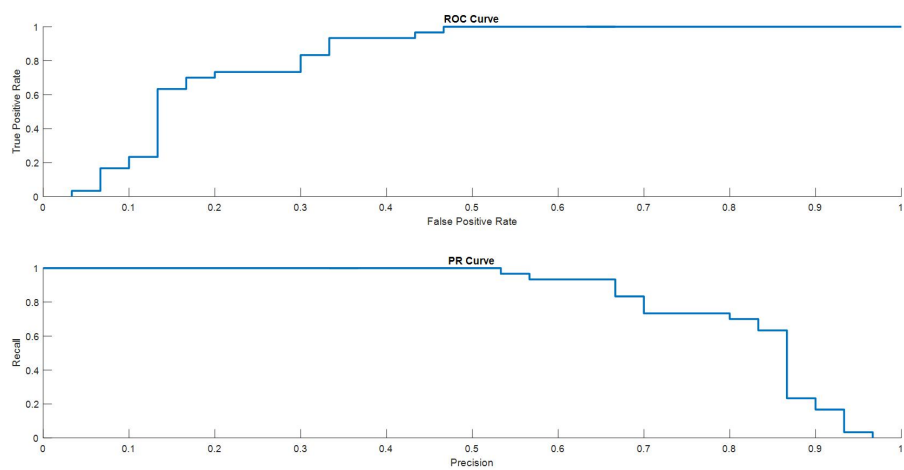

**Figure S6 The ROC and Recall Curves of Length=13**

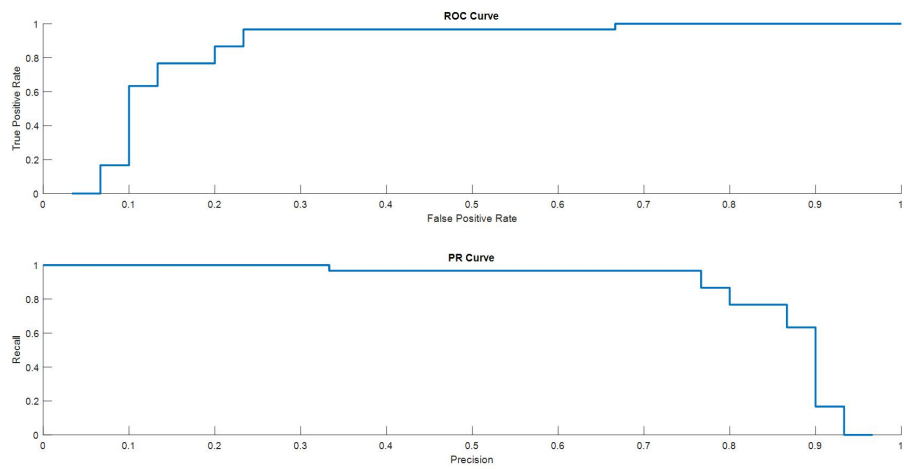

**Figure S7 The ROC and Recall Curves of Length=15**

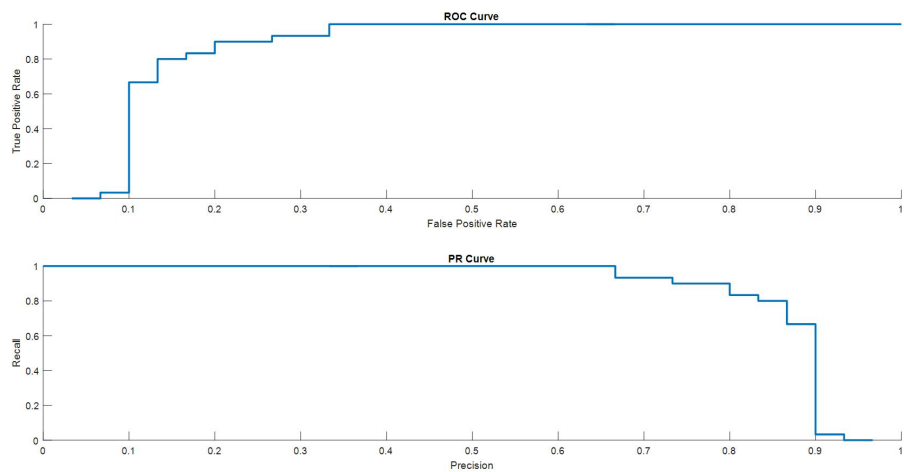

**Figure S8 The ROC and Recall Curves of  
Length=17**

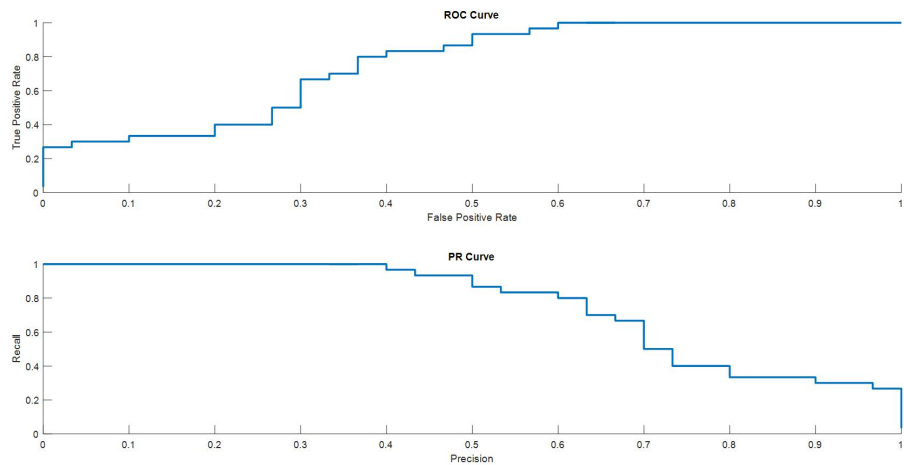

**Figure S9 The ROC and Recall Curves of Length=19**

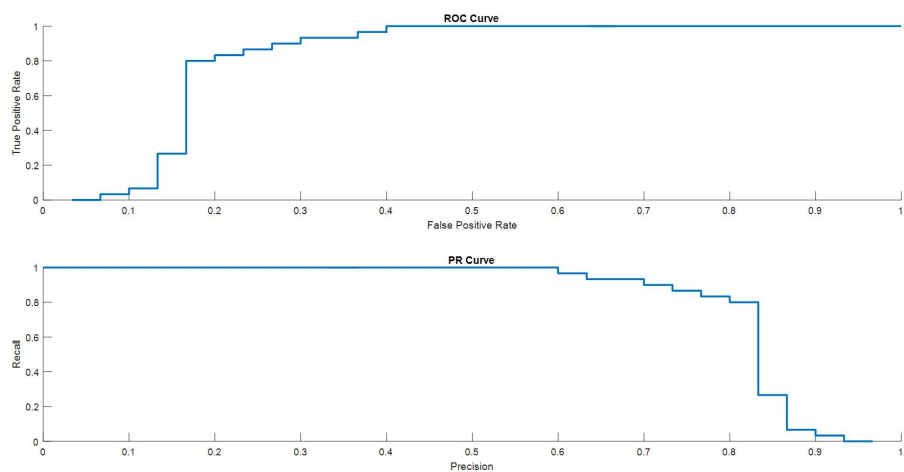

**Figure S10 The ROC and Recall Curves of Length=21**

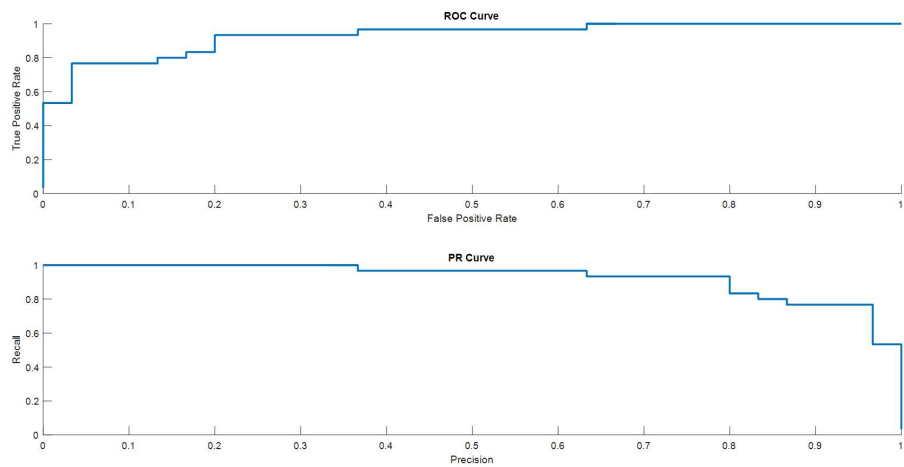

**Figure S11 The ROC and Recall Curves of Length=23**

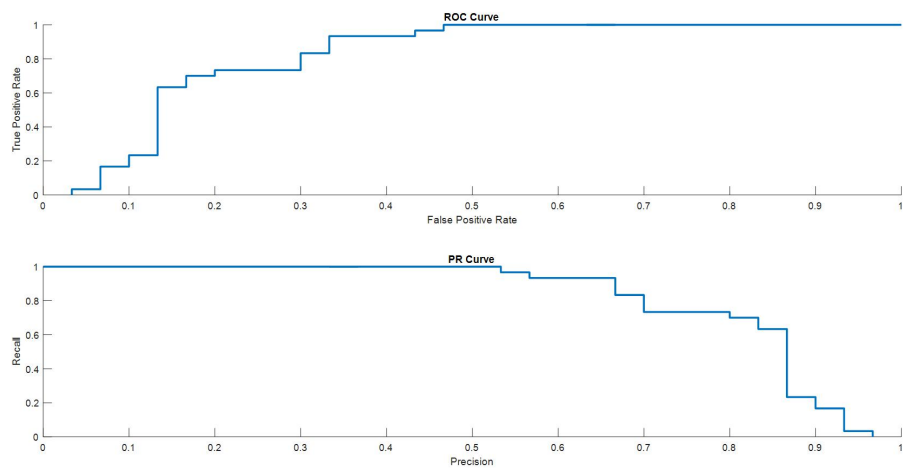

**Figure S12 The ROC and Recall Curves of Length=25**

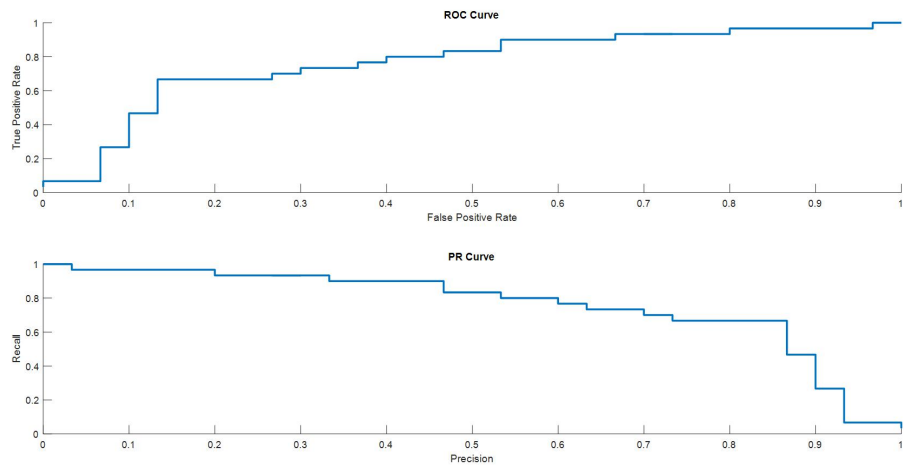

**Figure S13 The ROC and Recall Curves of Length=27**

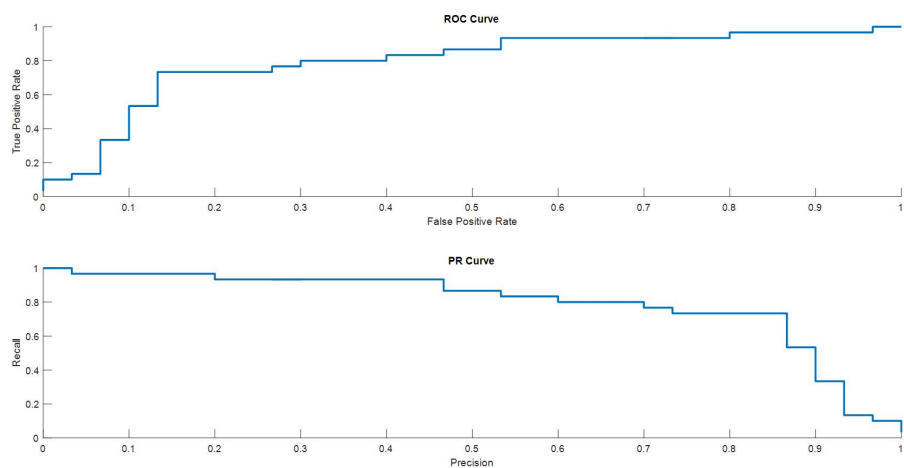

**Figure S14 The ROC and Recall Curves of Length=29**
